# Supplementary material for: Microbiological analysis of surgeons' hands in a public hospital in São Luis, Maranhão State, Brazil
Source: Preprints.org preprint supplement (doi:10.20944/preprints202306.0776.v1), 2023-06-12
Supplement: Supplementary file 1 [file supplementary]

This document certifies that the manuscript

## **Microbiology analysis of surgeons' hands**

prepared by the authors

**Artur Serra Neto, Sirlei Garcia Marques, Maria Rosa Quaresma Bonfim, Rosangela Cipriano de Souza, Rodolfo Acatauassu Nunes**

was edited for proper English language, grammar, punctuation, spelling, and overall style by one or more of the highly qualified native English speaking editors at AJE.

This certificate was issued on **May 22, 2023** and may be verified on the [AJE website](https://aje.com) using the verification code **82CC-5C76-E2FO-D31C-93D5**.

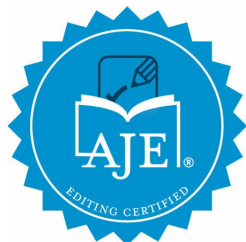

Neither the research content nor the authors' intentions were altered in any way during the editing process. Documents receiving this certification should be English-ready for publication; however, the author has the ability to accept or reject our suggestions and changes. To verify the final AJE edited version, please visit our verification page at [aje.com/certificate](https://aje.com/certificate). If you have any questions or concerns about this edited document, please contact AJE at [support@aje.com](mailto:support@aje.com).
